# Supplementary material for: The Occurrence and Co-Occurrence of Regulated, Emerging, and Masked Mycotoxins in Rice Bran and Maize from Southeast Asia
Source: MDPI journal article supplement (doi:10.3390/toxins14080567), 2022-08-19
Supplement: s1 [file s1]

# Supplementary Materials: The Occurrence and Co-occurrence of Regulated, Emerging and Masked Mycotoxins in Rice Bran and Maize from Southeast Asia

Wipada Siri-anusornsak , Oluwatobi Kolawole , Warapa Mahakarnchanakul <sup>1</sup>, Brett Greer , Awanwee Petch kongkaew, Julie Meneely , Christopher Elliott and Kanithaporn Vangnai\*

**Table S1.** The EU guidance levels for AFB<sub>1</sub> and recommended limits for some regulated mycotoxins in feed materials.

| Mycotoxins                                     | Matrix                      | Limits (µg.kg <sup>-1</sup> ) | References                            |
|------------------------------------------------|-----------------------------|-------------------------------|---------------------------------------|
| AFB <sub>1</sub>                               | All feed materials          | 20                            | European Commission, 2002. [15]       |
| The sum of FB <sub>1</sub> and FB <sub>2</sub> | Maize and maize products    | 60,000                        | Commission Recommendation, 2006. [16] |
| ZEN                                            | Cereals and cereal products | 2,000                         | Commission Recommendation, 2006. [16] |
|                                                | Maize by-products           | 3,000                         |                                       |
| OTA                                            | Cereals and cereal products | 250                           | Commission Recommendation, 2006. [16] |
| DON                                            | Cereals and cereal products | 8,000                         | Commission Recommendation, 2006. [16] |
|                                                | Maize by-products           | 12,000                        |                                       |

**Table S2.** Linearity data (R<sup>2</sup>), limit of detection (LOD), and limit of quantification (LOQ) of mycotoxins in the analysed rice bran and maize using LC-MS/MS.

| Mycotoxins                  | Linearity (R <sup>2</sup> ) |        | LOD (µg.kg <sup>-1</sup> ) |       | LOQ (µg.kg <sup>-1</sup> ) |       |
|-----------------------------|-----------------------------|--------|----------------------------|-------|----------------------------|-------|
|                             | Rice Bran                   | Maize  | Rice Bran                  | Maize | Rice Bran                  | Maize |
| <b>Regulated mycotoxins</b> |                             |        |                            |       |                            |       |
| Aflatoxin B <sub>1</sub>    | 0.9913                      | 0.9973 | 0.1                        | 0.05  | 0.5                        | 1.0   |
| Aflatoxin B <sub>2</sub>    | 0.9904                      | 0.9964 | 0.1                        | 0.04  | 0.5                        | 1.0   |
| Aflatoxin G <sub>1</sub>    | 0.9844                      | 0.9924 | 0.1                        | 0.04  | 0.5                        | 1.0   |
| Aflatoxin G <sub>2</sub>    | 0.9921                      | 0.9921 | 0.1                        | 0.04  | 0.5                        | 1.0   |
| Deoxynivalenol              | 0.9911                      | 0.9921 | 1.25                       | 1.25  | 5.0                        | 5.0   |
| Fumonisin B <sub>1</sub>    | 0.9922                      | 0.9952 | 1.50                       | 1.50  | 5.0                        | 5.0   |
| HT-2 toxin                  | 0.9943                      | 0.9943 | 1.00                       | 1.00  | 5.0                        | 5.0   |
| T-2 toxin                   | 0.9996                      | 0.9906 | 1.00                       | 1.00  | 5.0                        | 5.0   |
| Ochratoxin A                | 0.9943                      | 0.9943 | 0.50                       | 0.50  | 1.5                        | 1.5   |
| Zearalenone                 | 0.9912                      | 0.9962 | 1.50                       | 1.50  | 5.0                        | 5.0   |
| <b>Emerging mycotoxins</b>  |                             |        |                            |       |                            |       |
| Alternariol                 | 0.9911                      | 0.9927 | 0.05                       | 0.05  | 3.5                        | 3.5   |
| Beauvericin                 | 0.9921                      | 0.9921 | 0.05                       | 0.05  | 1.0                        | 1.0   |
| Enniatin A                  | 0.9917                      | 0.9967 | 0.05                       | 0.05  | 5.0                        | 5.0   |
| Enniatin A <sub>1</sub>     | 0.9934                      | 0.9934 | 0.05                       | 0.05  | 2.5                        | 2.5   |
| Enniatin B                  | 0.9954                      | 0.9954 | 0.05                       | 0.05  | 2.5                        | 2.5   |
| Enniatin B <sub>1</sub>     | 0.9935                      | 0.9935 | 0.05                       | 0.05  | 2.5                        | 2.5   |
| Ergocornine                 | 0.9912                      | 0.9942 | 0.50                       | 0.50  | 2.5                        | 2.5   |
| Ergocristine                | 0.9911                      | 0.9941 | 0.50                       | 0.50  | 2.5                        | 2.5   |
| Stachybotrylactam           | 0.9902                      | 0.9952 | 1.50                       | 1.50  | 5.0                        | 5.0   |
| Sterigmatocystin            | 0.9931                      | 0.9931 | 0.50                       | 0.50  | 2.5                        | 2.5   |
| <b>Masked mycotoxins</b>    |                             |        |                            |       |                            |       |
| 3-acetyl deoxynivalenol     | 0.9917                      | 0.9917 | 25.0                       | 25.0  | 50.0                       | 50    |
| 15-acetyl deoxynivalenol    | 0.9916                      | 0.9966 | 5.0                        | 5.0   | 20.0                       | 20    |
| Deoxynivalenol-3-glucoside  | 0.9941                      | 0.9911 | 10.0                       | 10    | 50.0                       | 50    |
| Alpha-Zearalenol            | 0.9951                      | 0.9948 | 0.05                       | 5.0   | 3.5                        | 10    |

|                           |        |        |      |      |     |    |
|---------------------------|--------|--------|------|------|-----|----|
| Beta-Zearalenol           | 0.9932 | 0.9932 | 0.05 | 5.0  | 3.5 | 10 |
| Zearalenone-14- glucoside | 0.9926 | 0.9956 | 0.50 | 10.0 | 2.5 | 50 |
| Zearalenone-16- glucoside | 0.9934 | 0.9902 | 0.50 | 10.0 | 2.5 | 50 |

**Table S3.** Recovery and precision of mycotoxins in the analysed rice bran and maize by LC-MS/MS.

| Mycotoxins                  | Extraction Recovery (%) |       | RSD <sub>r</sub> * (%) |       | RSDR** (%) |       |
|-----------------------------|-------------------------|-------|------------------------|-------|------------|-------|
|                             | Rice Bran               | Maize | Rice Bran              | Maize | Rice Bran  | Maize |
| <b>Regulated mycotoxins</b> |                         |       |                        |       |            |       |
| Aflatoxin B <sub>1</sub>    | 90                      | 97    | 12                     | 9     | 6.9        | 3.4   |
| Aflatoxin B <sub>2</sub>    | 85                      | 96    | 10                     | 11    | 4.1        | 2.6   |
| Aflatoxin G <sub>1</sub>    | 86                      | 104   | 8                      | 5     | 3.8        | 2.7   |
| Aflatoxin G <sub>2</sub>    | 86                      | 98    | 7                      | 7     | 5.5        | 3.6   |
| Deoxynivalenol              | 82                      | 75    | 8                      | 5     | 13.1       | 7.2   |
| Fumonisin B <sub>1</sub>    | 76                      | 80    | 12                     | 15    | 8.9        | 6.1   |
| HT-2 toxin                  | 80                      | 79    | 10                     | 9     | 1.9        | 2.3   |
| T-2 toxin                   | 75                      | 82    | 11                     | 4     | 1.6        | 2.9   |
| Ochratoxin A                | 85                      | 95    | 10                     | 8     | 4.6        | 2.8   |
| Zearalenone                 | 85                      | 82    | 6                      | 6     | 6.2        | 4.0   |
| <b>Emerging mycotoxins</b>  |                         |       |                        |       |            |       |
| Alternariol                 | 85                      | 89    | 8                      | 5     | 7.8        | 6.0   |
| Beauvericin                 | 80                      | 80    | 7                      | 8     | 8.5        | 6.0   |
| Enniatin A                  | 90                      | 97    | 13                     | 5     | 6.9        | 8.7   |
| Enniatin A <sub>1</sub>     | 85                      | 86    | 8                      | 11    | 5.9        | 4.4   |
| Enniatin B                  | 85                      | 94    | 8                      | 7     | 7.8        | 9.0   |
| Enniatin B <sub>1</sub>     | 88                      | 88    | 12                     | 10    | 9.9        | 3.5   |
| Ergocornine                 | 77                      | 91    | 7                      | 4     | 4.9        | 4.8   |
| Ergocristine                | 77                      | 98    | 10                     | 10    | 10.6       | 3.9   |
| Stachybotrylactam           | 91                      | 91    | 5                      | 6     | 5.1        | 3.0   |
| Sterigmatocystin            | 92                      | 105   | 4                      | 5     | 7.0        | 8.9   |
| <b>Masked mycotoxins</b>    |                         |       |                        |       |            |       |
| 3-acetyl deoxynivalenol     | 80                      | 82    | 9                      | 5     | 4.6        | 8.7   |
| 15-acetyl deoxynivalenol    | 86                      | 85    | 6                      | 5     | 8.9        | 13.4  |
| Deoxynivalenol-3-glucoside  | 86                      | 85    | 7                      | 5     | 14.4       | 8.5   |
| Alpha-Zearalenol            | 75                      | 87    | 3                      | 10    | 4.5        | 3.9   |
| Beta-Zearalenol             | 76                      | 86    | 13                     | 15    | 4.6        | 6.1   |
| Zearalenone-14- glucoside   | 71                      | 78    | 5                      | 10    | 5.1        | 9.3   |
| Zearalenone-16-glucoside    | 72                      | 79    | 4                      | 10    | 7.0        | 8.1   |

\*RSD<sub>r</sub> for repeatability, \*\* RSDR for reproducibility

**Table S4.** The occurrence and concentration of mycotoxins in rice bran and maize.

| Mycotoxins                                                                              | Rice Bran (N = 125) |              |                                      |        |       | Maize (N = 125)     |              |                                      |         |        |
|-----------------------------------------------------------------------------------------|---------------------|--------------|--------------------------------------|--------|-------|---------------------|--------------|--------------------------------------|---------|--------|
|                                                                                         | Positive Sample (n) | % Prevalence | Concentration (µg.kg <sup>-1</sup> ) |        |       | Positive Sample (n) | % Prevalence | Concentration (µg.kg <sup>-1</sup> ) |         |        |
|                                                                                         |                     |              | Min                                  | Max    | Mean  |                     |              | Min                                  | Max     | Mean   |
| Regulated mycotoxins                                                                    |                     |              |                                      |        |       |                     |              |                                      |         |        |
| Aflatoxins (AFB <sub>1</sub> , AFB <sub>2</sub> , AFG <sub>1</sub> , AFG <sub>2</sub> ) | 125                 | 100          | 0.4                                  | 271.1  | 13.1  | 125                 | 100          | 0.1                                  | 2149.7  | 159.4  |
| Fumonisin B <sub>1</sub>                                                                | 125                 | 100          | 61.5                                 | 7013.8 | 579.6 | 121                 | 97           | 1.8                                  | 20900.9 | 2786.0 |
| Zearalenone                                                                             | 125                 | 100          | 21.9                                 | 1728.4 | 183.2 | 81                  | 65           | 2.2                                  | 751.3   | 29.4   |
| Ochratoxin A                                                                            | 124                 | 99           | 1.8                                  | 43.7   | 20.1  | 113                 | 90           | 0.3                                  | 65.5    | 12.0   |
| Deoxynivalenol                                                                          | 117                 | 94           | 0.1                                  | 218.9  | 56.0  | 57                  | 45           | 0.6                                  | 598.3   | 31.8   |
| HT-2 toxin                                                                              | 102                 | 82           | 1.8                                  | 23.0   | 18.0  | 36                  | 29           | 1.7                                  | 9786.0  | 283.6  |
| T2 toxin                                                                                | 84                  | 67           | 0.7                                  | 7.9    | 6.7   | 40                  | 32           | 0.7                                  | 61.8    | 7.3    |
| Emerging mycotoxins                                                                     |                     |              |                                      |        |       |                     |              |                                      |         |        |
| Beauvericin                                                                             | 125                 | 100          | 1.3                                  | 2281.0 | 130.4 | 116                 | 93           | 0.03                                 | 1459.2  | 61.2   |
| Enniatin B                                                                              | 125                 | 100          | 0.1                                  | 15.4   | 2.6   | 124                 | 99           | -                                    | 0.03    | -      |
| Enniatin B <sub>1</sub>                                                                 | 125                 | 100          | 0.5                                  | 14.7   | 4.6   | 122                 | 98           | 0.03                                 | 0.8     | 0.04   |
| Sterigmatocystin                                                                        | 122                 | 98           | 2.8                                  | 272.3  | 26.6  | 54                  | 43           | 0.3                                  | 17.9    | 8.8    |
| Stachybotrylactam                                                                       | 99                  | 79           | 1.5                                  | 29.5   | 15.5  | 12                  | 10           | 0.8                                  | 15      | 9.5    |
| Alternariol                                                                             | 50                  | 40           | 0.03                                 | 0.8    | 0.1   | 88                  | 70           | 0.03                                 | 3.5     | 0.1    |
| Masked mycotoxins                                                                       |                     |              |                                      |        |       |                     |              |                                      |         |        |
| zearalenone-14-glucoside                                                                | 75                  | 60           | 1.3                                  | 20.7   | 10.5  | 3                   | 2            | 0.8                                  | 9.3     | 3.7    |
| zearalenone-16-glucoside                                                                | 70                  | 56           | 1.0                                  | 39.5   | 12.9  | 1                   | 0.8          | -                                    | 5.0     | -      |
